# Supplementary material
Source: publisher figshare collection journal article supplement (https://gsajournals.figshare.com/articles/dataset/_/9633668)
Supplement: Supplementary file 1 [file 1]

**Supplemental Figures for Wang *et al.*, 2019**

**Role of the chromosome architectural factor, SMCHD1, in X chromosome  
inactivation, gene regulation, and disease in humans**

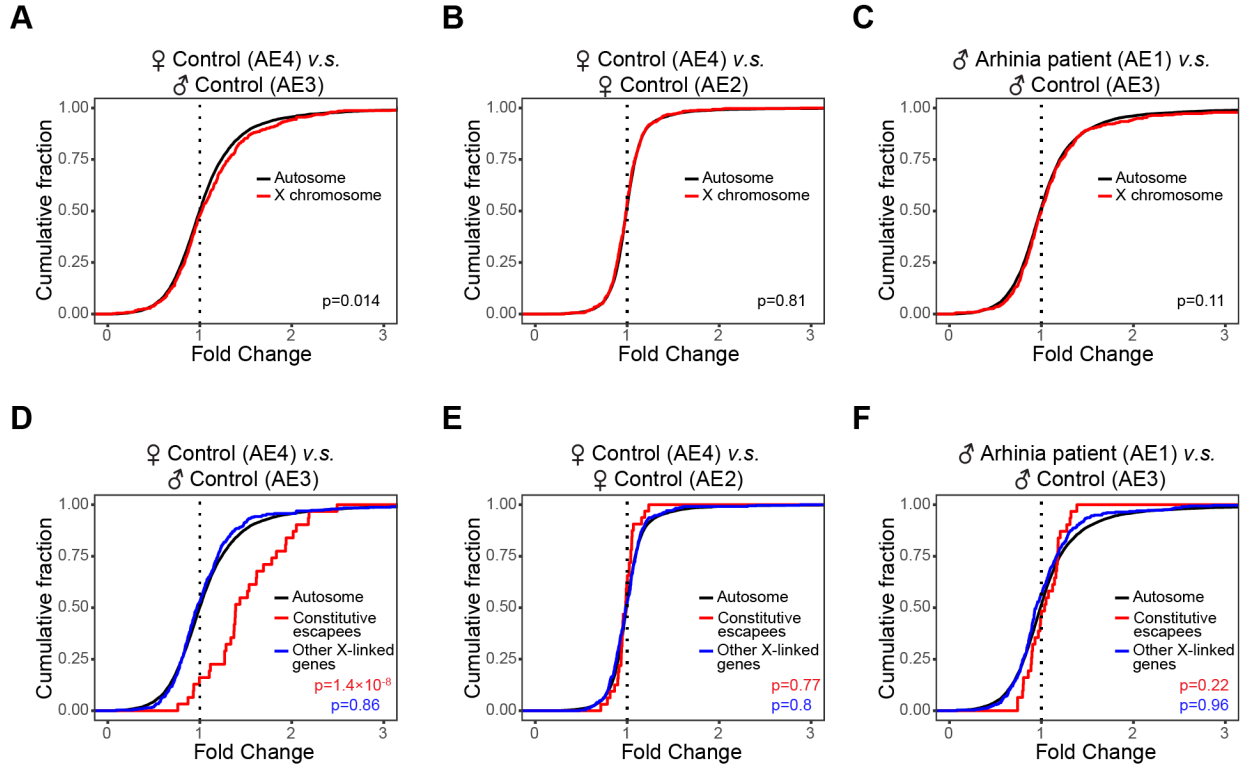

**Figure S1. Upregulation of constitutive escapees in females relative to males.**

- (A) Cumulative distribution plots (CDPs) comparing fold changes for X-linked and autosomal genes between a female and a male control. *P*-values given by Wilcoxon ranked sum test (unpaired, one-sided).
- (B) CDPs comparing fold changes for X-linked and autosomal genes between two female controls.
- (C) CDPs comparing fold changes for X-linked and autosomal genes between two male controls.
- (D) CDPs comparing fold changes for constitutive escapees ( $n=49$ ), other X-linked genes (excluding facultative escapees and genes at the pseudo-autosomal regions), and autosomal genes between a female and a male control. *P*-values: constitutive escapees versus autosomal genes (black); other X-linked genes versus autosomal genes (blue).
- (E) CDPs comparing fold changes for constitutive escapees, other X-linked genes, and autosomal genes between two female controls.
- (F) CDPs comparing fold changes for constitutive escapees, other X-linked genes, and autosomal genes between two male controls.

**A**

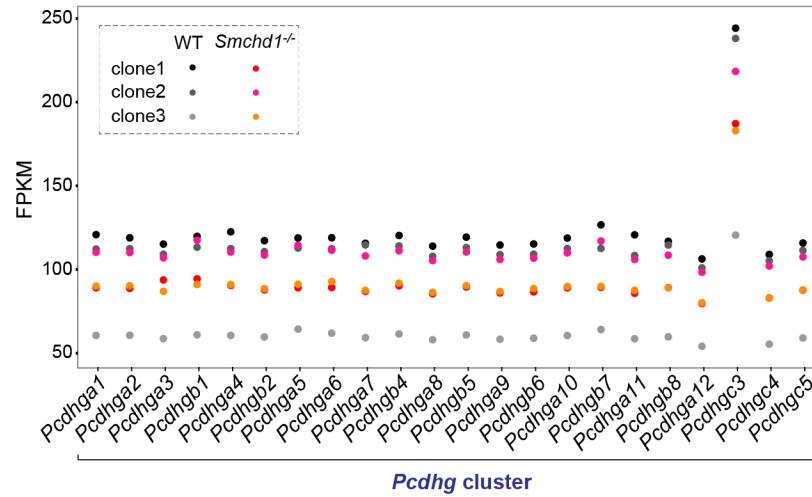

**B**

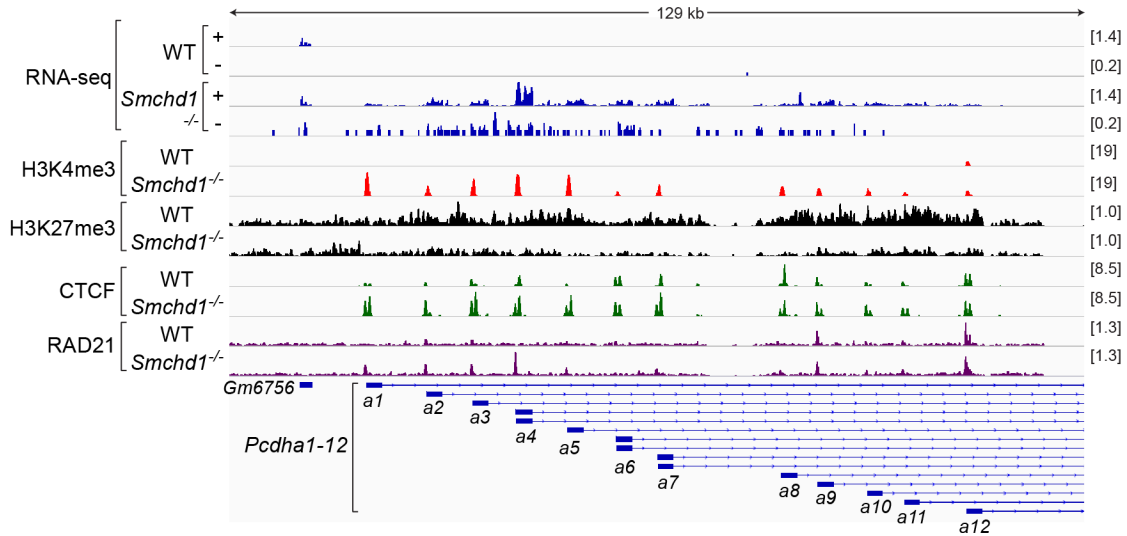

**Figure S2. *Pcdhg* expression is not affected by *Smchd1* ablation in mouse NPCs.**

(A) Dot plots showing the FPKMs of the 22 *Pcdhg* genes in WT (n=3) and *Smchd1*<sup>-/-</sup> (n=3) mouse NPC clones.

(B) RNA-seq, H3K4me3, H3K27me3, CTCF, and RAD21 ChIP-seq (GSE99991) tracks at the *Pcdha1-12* region in WT (clone1) and *Smchd1*<sup>-/-</sup> (clone1) female mouse NPCs, with scales indicated in each track. Note that the scales for RNA-seq plus and minus strands were set differently to better visualize antisense transcription in *Smchd1*<sup>-/-</sup> cells. +, the plus strand. -, the minus strand. Also note that each of the *Pcdha1-12* alternate exons was marked by two adjacent CTCF ChIP-seq “peaks,” as two CTCF-binding sites were present at each alternate exon (Guo et al., 2012; Monahan et al., 2012).

A

| Patient ID | Mutation type | Nucleotide mutation | Exon | Amino acid alteration | Position        | SMCHD1 abundance                      | SMCHD1 activity                                          |
|------------|---------------|---------------------|------|-----------------------|-----------------|---------------------------------------|----------------------------------------------------------|
| AE1        | Missense      | g.2697032A>G        | 9    | p.His348Arg           | GHKL ATPase     | No effect (Shaw <i>et al.</i> , 2017) | Increased ATPase activity (Gurzaei <i>et al.</i> , 2018) |
| B1         | Missense      | g.2700840A>G        | 12   | p.Asn524Ser           | Extended region | No effect (Shaw <i>et al.</i> , 2017) | Not tested                                               |
| C1         | Missense      | g.2667029G>C        | 3    | p.Leu141Phe           | GHKL ATPase     | No effect (Shaw <i>et al.</i> , 2017) | Not tested                                               |
| D1         | Missense      | g.2666992T>A        | 3    | p.Met129Lys           | GHKL ATPase     | No effect (Shaw <i>et al.</i> , 2017) | Not tested                                               |
| E1         | Missense      | g.2667029G>C        | 3    | p.Leu141Phe           | GHKL ATPase     | No effect (Shaw <i>et al.</i> , 2017) | Not tested                                               |
| W1         | Missense      | g.2700611G>C        | 11   | p.Glu473Gln           | Extended region | No effect (Shaw <i>et al.</i> , 2017) | Not tested                                               |

B

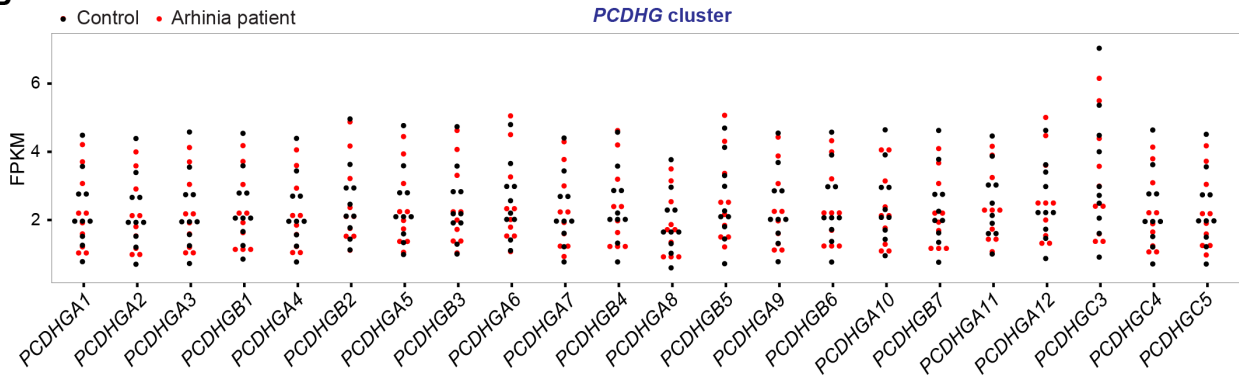

C

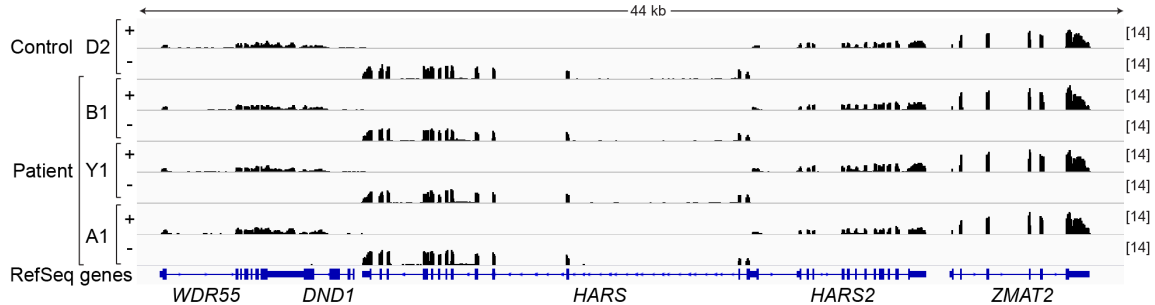

**Figure S3. *PCDHB* and *PCDHG* expression in arhinia patients.**

- (A) A table listing the cohort of six male arhinia their associated *SMCHD1* mutations. Together with the four female arhinia patients included in Figure 1A, a total of 10 arhinia patients were included in our analysis of autosomal gene expression.
- (B) Dot plots showing the FPKMs of the 22 *PCDHG* genes in LCLs of 10 arhinia patients (red) and 10 controls (black).
- (C) Strand-resolved RNA-seq coverage tracks at a region upstream to the *PCDHA* gene cluster of two arhinia patients (B1, Y1, and A1) and one control (D2). +, the plus strand. -, the minus strand.

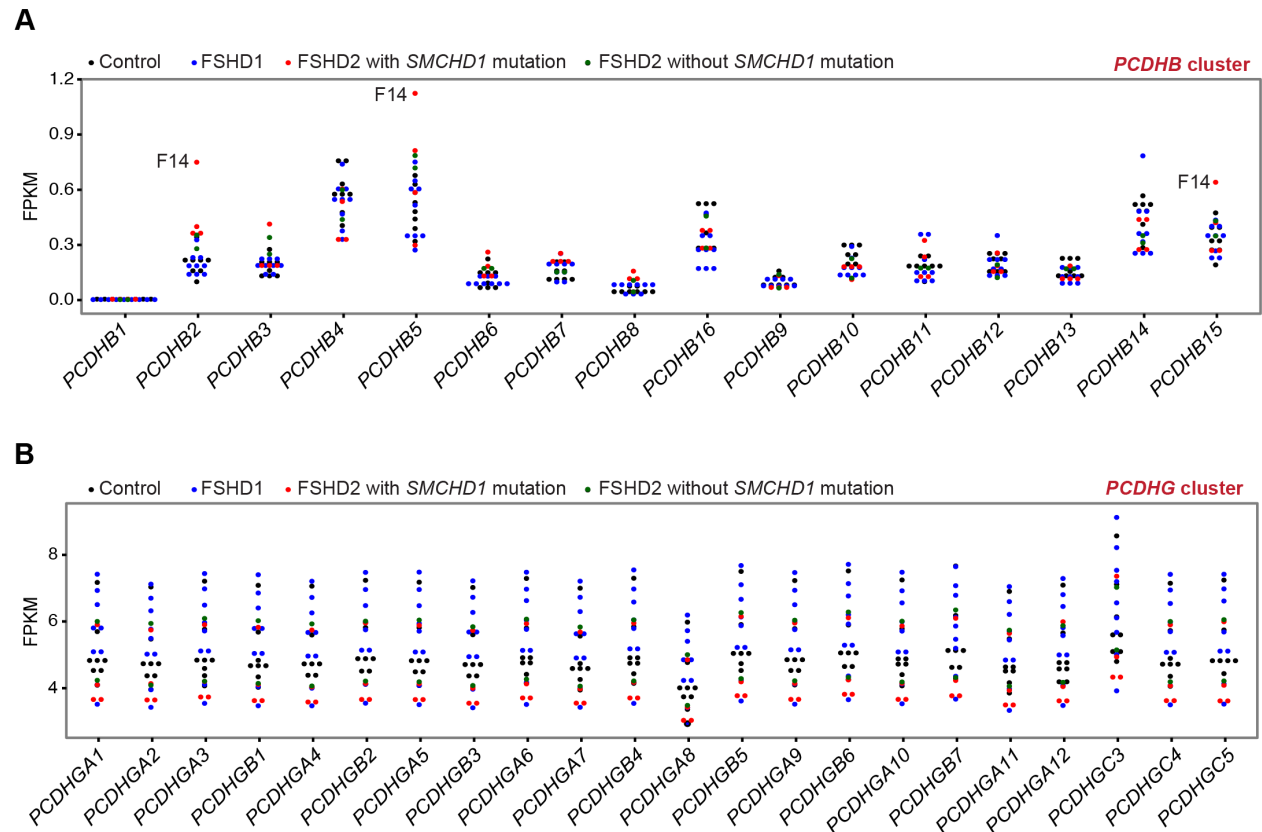

**Figure S4. *PCDHB* and *PCDHG* expression in FSHD2 patients.**

(A) Dot plots showing the FPKMs of the 16 *PCDHB* genes in muscle biopsies of 9 FSHD1 patients (blue), 3 FSHD2 patients carrying *SMCHD1* mutations (red), 2 FSHD2 patients without *SMCHD1* mutations (green), and 8 controls (black).

(B) Dot plots showing the FPKMs of the 22 *PCDHG* genes in the muscle biopsy cohort of FSHD.

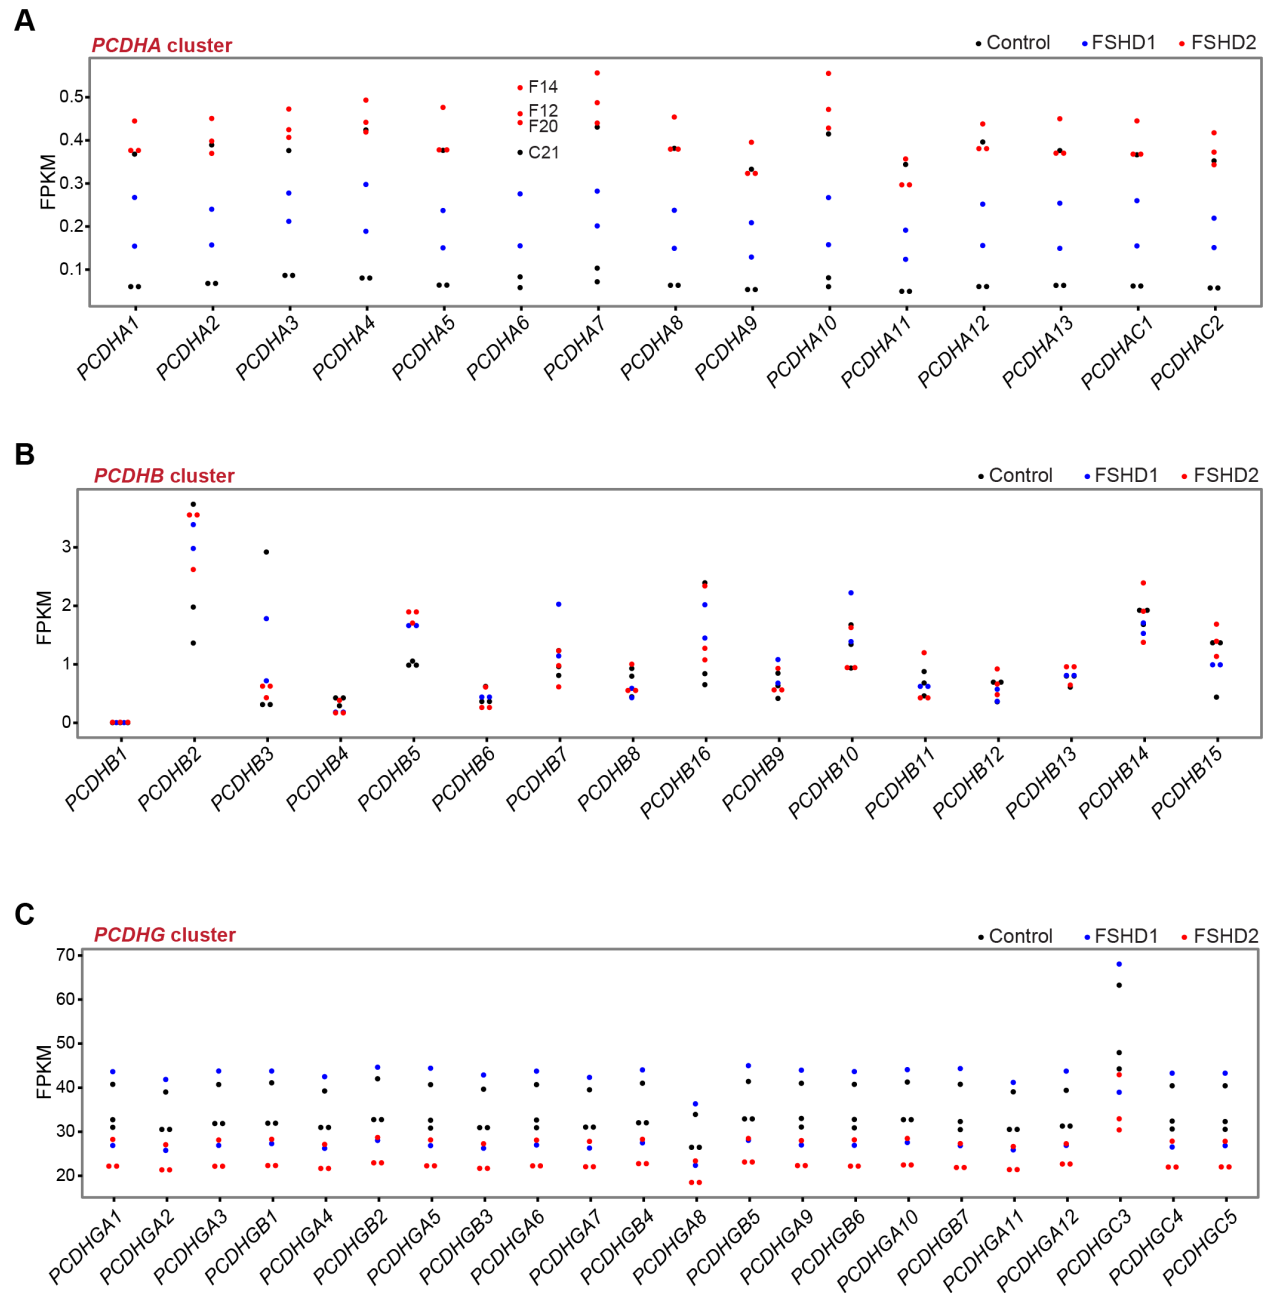

**Figure S5. Slight upregulation of the *PCDHA* genes in the myotube culture of FSHD2 patient F14.**

- (A) Dot plots showing the FPKMs of the 14 *PCDHA* genes in *in vitro* cultured myotubes of 2 FSHD1 patients (blue), 3 FSHD2 patients carrying *SMCHD1* mutations (red), and 3 controls (black).
- (B) Dot plots showing the FPKMs of the 16 *PCDHB* genes in the cohort of cultured FSHD myotubes.
- (C) Dot plots showing the FPKMs of the 22 *PCDHG* genes in the cohort of cultured FSHD myotubes.

**A**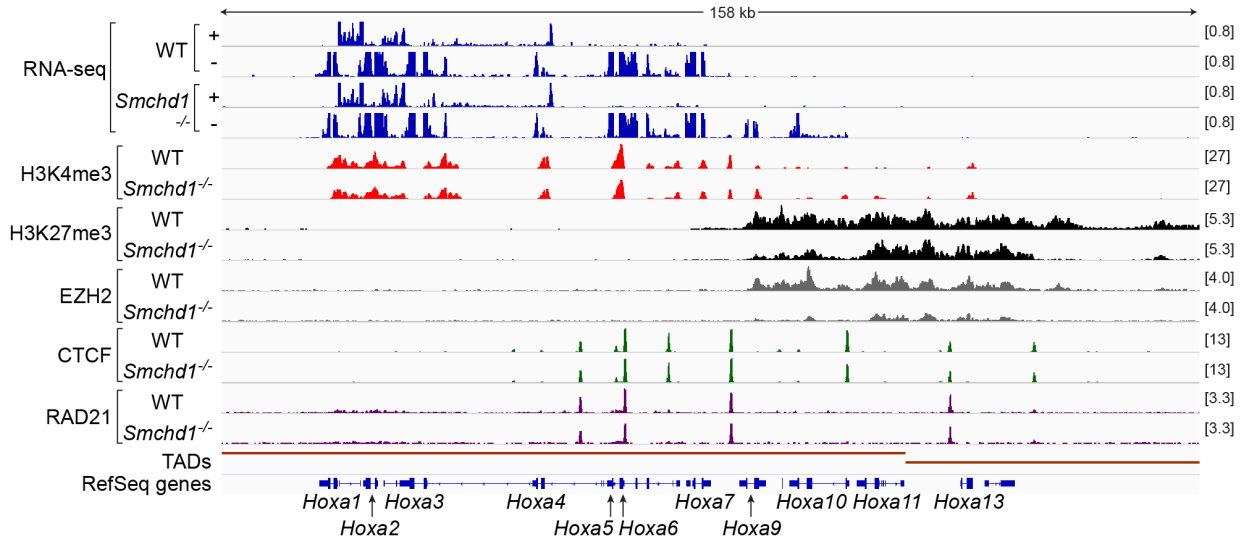**B**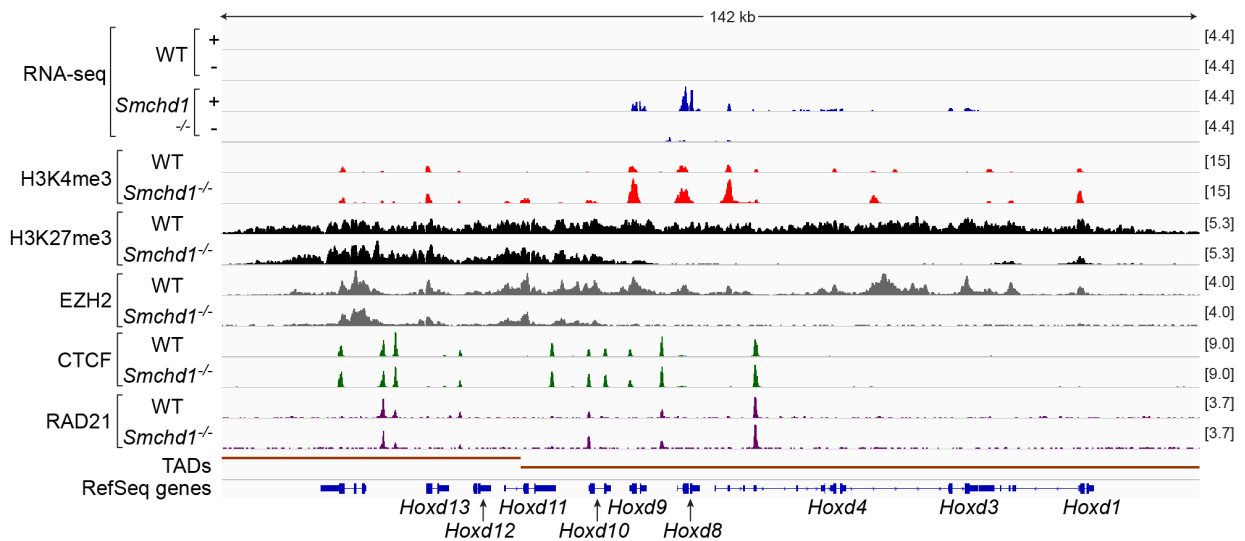

**Figure S6. *Smchd1* ablation affects the expression and chromatin states of the *HoxA* and *HoxD* cluster in mice.**

- (A) RNA-seq, H3K4me3, H3K27me3, EZH2, CTCF, and RAD21 ChIP-seq (GSE99991) tracks at the *HoxA* cluster in WT and *Smchd1*<sup>-/-</sup> female mouse NPCs, with scales indicated in each track. Also shown are TADs defined in Dixon *et al.*, 2012.
- (B) RNA-seq, H3K4me3, H3K27me3, EZH2, CTCF, and RAD21 ChIP-seq (GSE99991) tracks at the *HoxD* cluster in WT and *Smchd1*<sup>-/-</sup> female mouse NPCs, with scales indicated in each track. Also shown are TADs defined in Dixon *et al.*, 2012.

**A**

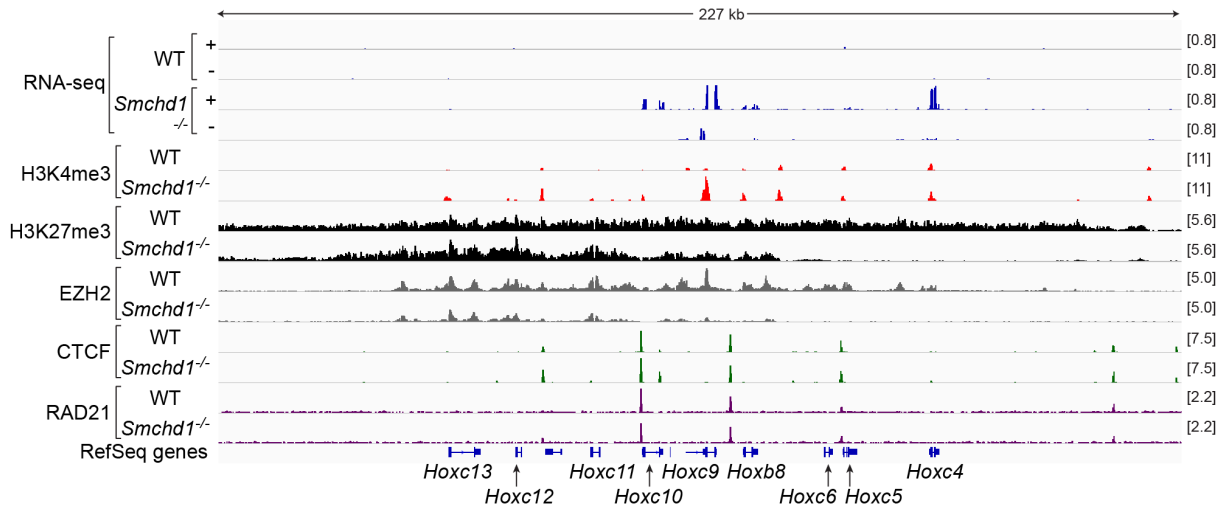

**B**

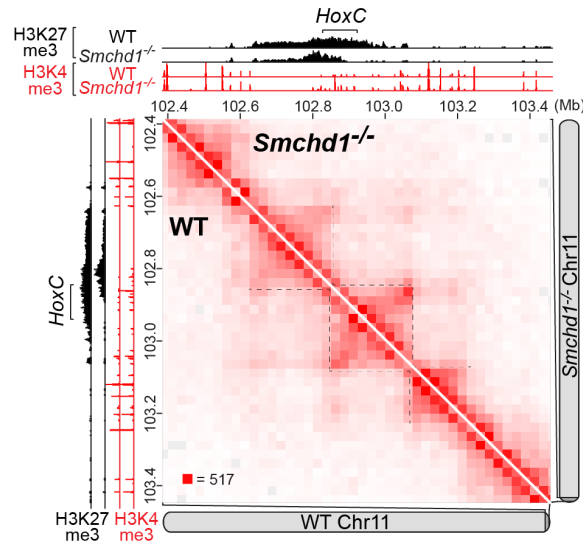

**C**

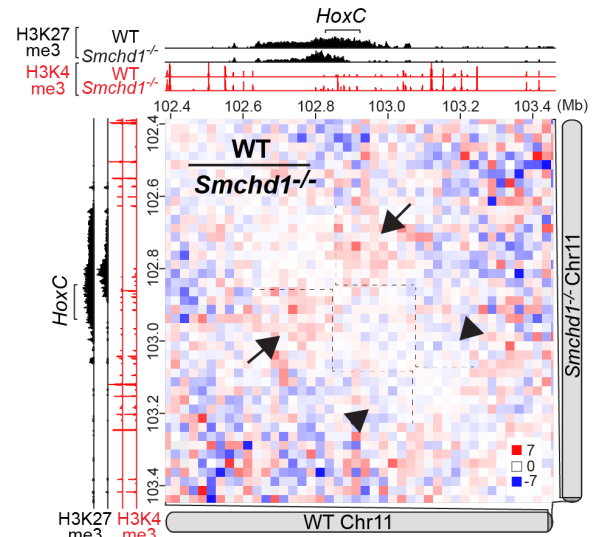

**Figure S7. *Smchd1* ablation affects the expression, chromatin states, and 3D organization of *HoxC* cluster in mice.**

- (A) RNA-seq, H3K4me3, H3K27me3, *Ezh2*, CTCF, and RAD21 ChIP-seq (GSE99991) tracks at the *HoxC* cluster in WT and *Smchd1*<sup>-/-</sup> female mouse NPCs, with scales indicated in each track.
- (B) Hi-C contact maps at 25-kb resolution at the *HoxC* cluster in WT (bottom) and *Smchd1*<sup>-/-</sup> (top) female mouse NPCs (GSE99991). Also shown are H3K4me3 and H3K27me3 ChIP-seq tracks in WT and *Smchd1*<sup>-/-</sup> female mouse NPCs.
- (C) Differential Hi-C contact maps generated by dividing the WT with the *Smchd1*<sup>-/-</sup> contact map at 25-kb resolution at the *HoxC* cluster (GSE99991).
